# Supplementary material for: A scoping review of biomechanical testing for proximal humerus fracture implants
Source: BMC Musculoskelet Disord. 2015 Jul 30;16:175. doi: 10.1186/s12891-015-0627-x (PMC4520267; doi:10.1186/s12891-015-0627-x)
Supplement: Additional file 2: — Implants tested in each included study. (XLSX 46 kb) [file 12891_2015_627_MOESM2_ESM.xlsx]

## Sheet: Sheet1
		Implants Tested
Author	Sample Size	Fixed Angle Locking Plate	Non Locking Plate	Blade Plate	Intramedullary Device	Arthroplasty	Ex Fix
Bae 2011	14	x
Brianza 2010	16	x			x
Brianza 2012	19	x
Brunner 2012	6	x
Carrera 2008	10
Castoldi 2010	72	x					x
Chow 2012	16	x
Chudik 2003	48	x	x
De Wilde 2004	18					x
Dietz 2012	22	x			x
Duda 2007	12
Durigan 2005	36
Edwards 2006	24	x			x
Eichhorn 2011	0
Erhardt 2012	30	x
Esen 2009	16
Frankhauser 2003	64
Foruria 2010	12	x			x
Frankle 2001	5					x
Frankle 2002	8	x				x
Friedl 2012	10				x
Fuchtmeier 2006	24	x	x		x
Gillespie 2009	24	x	x	x
Gradl 2012	22	x
Hessmann 2005	48	x	x		x
Horn 2011	16				x
Huffman 2008	8					x
Instrum 1998	24		x	x
Jiang 2007	36
Kedgley 2008	14					x
Kitson 2007	12	x			x
Koval 1996	120		x		x
Kralinger 2008	9	x
Kalinger 2009	20
Kwon 2002	36		x	x
Lescheid 2010	40	x
Lever 2008	25		x	x
Liew 2000	10
Lill 2003	35	x	x		x
Maldonado 2003	7	x
Mathison 2010	12	x
Naidu 1997	10
Onder 2012	5	x
Osterhoff 2011	20	x
Rajesh 2003	10				x
Roederer 2011	22	x	x
Rothstock 2012	24
Ruch 2000	16		x		x
Saitoh 1993	150
Saitoh 1994	150
Sanders 2007	10	x			x
Schumer 2010	32	x
Sehr 1998	20		x	x
Seide 2006	24	x	x
Siffri 2006	24	x		x
Stedtfeld 2012	8	x
Tingart 2006	16
Unger 2012	24	x
Vogel 2007	30
Voigt 2009	52	x
Voigt 2011	24	x
Wallace 2012	12	x
Weinstein 2006	12	x		x
Wheeler 1997	12				x
Williams 1997	10
Wychowanski 2008	66				x
Zettl 2011	18	x
